# Supplementary material for: The biodiversity Composition of Microbiome in Ovarian Carcinoma Patients
Source: PubMed Central journal article supplement (PMC6368644; doi:10.1038/s41598-018-38031-2), 2019-02-08
Supplement: 41598_2018_38031_MOESM1_ESM.pdf [file 41598_2018_38031_MOESM1_ESM.pdf]

## Supplementary Information

### The biodiversity Composition of Microbiome in Ovarian Carcinoma Patients

Bo Zhou<sup>1,\*</sup>, Chaoyang Sun<sup>1,\*</sup>, Jia Huang<sup>1</sup>, Meng Xia<sup>1</sup>, Ensong Guo<sup>1</sup>, Na Li<sup>1</sup>, Hao Lu<sup>1</sup>, Wanying Shan<sup>1</sup>, Yifan Wu<sup>1</sup>, Yuan Li<sup>1</sup>, Xiao Xu<sup>1</sup>, Danhui Weng<sup>1</sup>, Li Meng<sup>1</sup>, Junbo Hu<sup>1</sup>, Qinglei Gao<sup>1</sup>, Ding Ma<sup>1</sup> & Gang Chen<sup>1</sup>

<sup>1</sup>Cancer Biology Research Center, Tongji Hospital, Tongji Medical College, Huazhong University of Science and Technology, Wuhan, Hubei 430030, China

\*These authors contributed equally to this work.

**Running title:** Microbial Dysbiosis in Human Ovarian Cancer

**Correspondence to:** Dr. Gang Chen, Cancer Biology Research Center, Tongji Hospital, Tongji

Medical College, Huazhong University of Science and Technology, Wuhan, Hubei 430030, China;

E-mail: chengang@tjh.tjmu.edu.cn

Dr. Ding Ma, Cancer Biology Research Center, Tongji Hospital, Tongji Medical College, Huazhong University of Science and Technology, Wuhan, Hubei 430030, China; E-mail: dma@tjh.tjmu.edu.cn

**Figure S1** Microbiota composition in 25 ovarian carcinoma patients (C group), 25 normal distal fallopian tube tissues (N group) and environmental negative control samples (EN group), identified by 16S rRNA sequencing. The relative abundances of bacterial phyla identified in each tissue samples and EN were visualized by bar plots. Each bar represents a subject and each colored box a bacterial taxon. The height of a colored box represents the relative abundance of that organism within the sample. Taxa present in less than 1% abundance in a given sample are displayed in the “others” at the top of the graph.

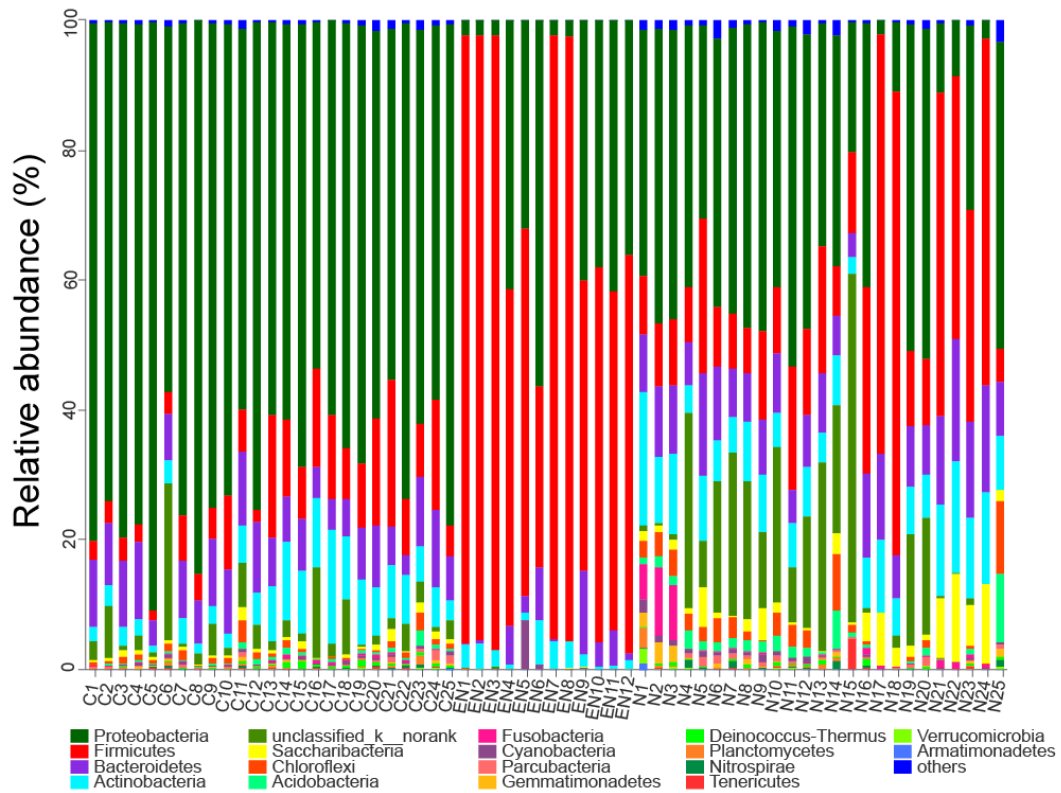

**Figure S2** Heatmap of percentage of the significantly statistically different phyla (a), genera (b) and species (c) in the tissues of each sample based on 16S rRNA sequencing.

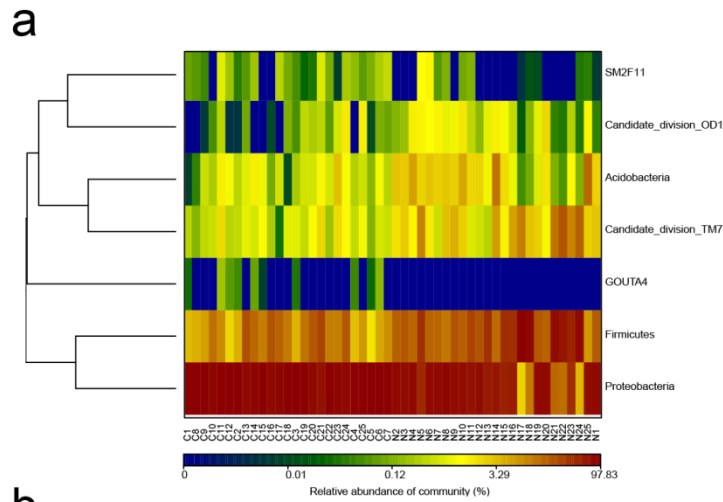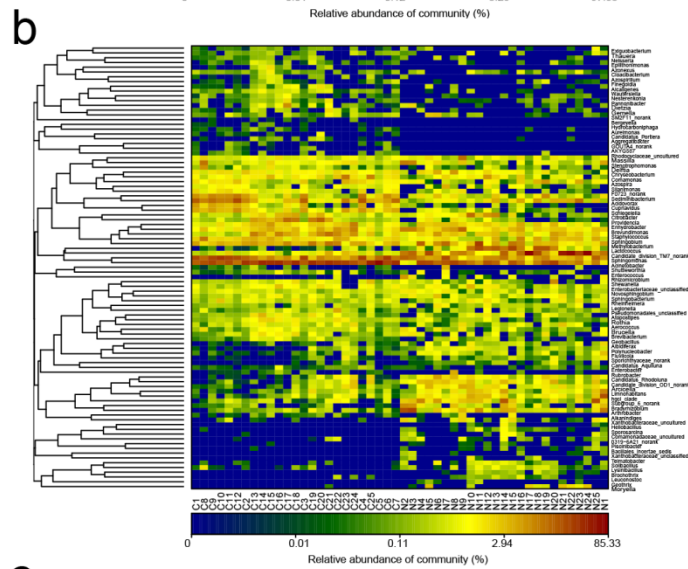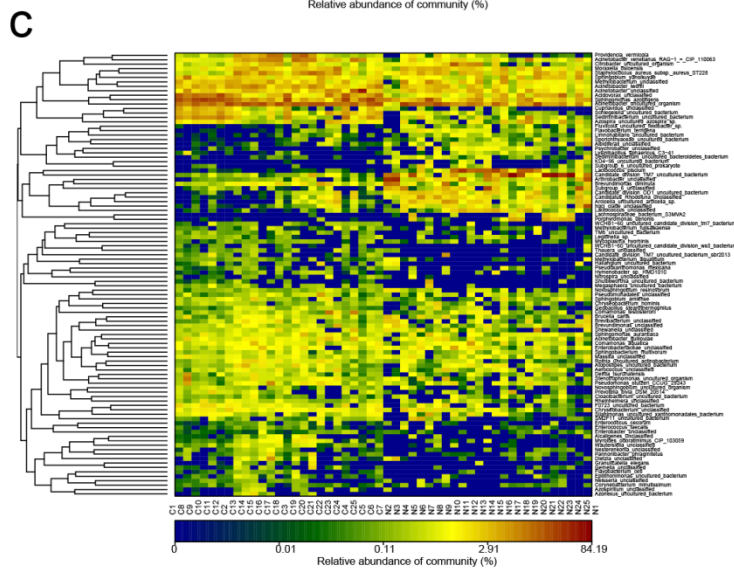

**Figure S3** Histogram of the LDA scores for differentially abundant species. Only taxa meeting a LDA significant threshold of 3.5 are shown.

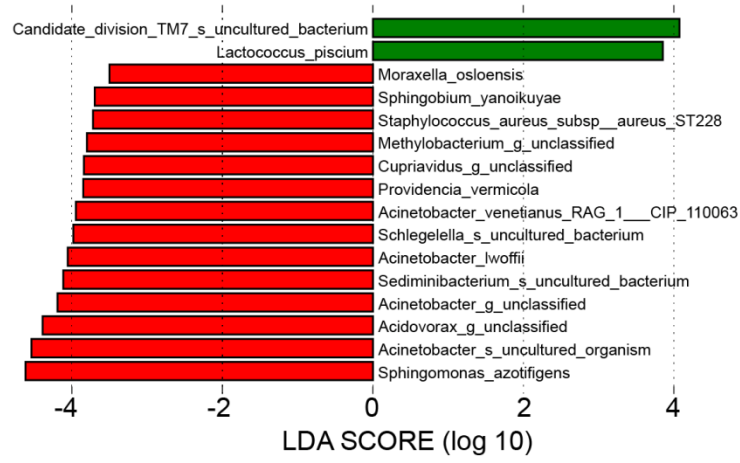

**Figure S4** Heatmap of inflammation and immune associated gene profiles using non-supervised hierarchical clustering. (con. represents normal distal fallopian tube tissues. Case represents ovarian cancer tissues.)

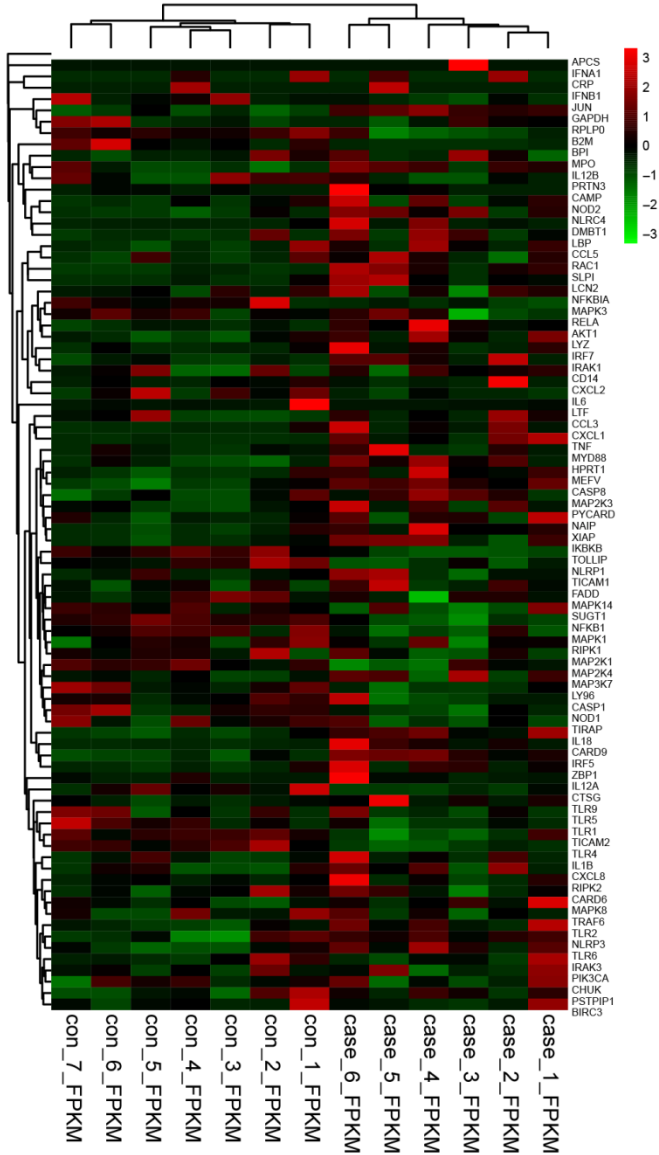

**Table S1** Comparison of the phylotype Good' s coverage, the richness estimators and the diversity index of the 16S rRNA gene libraries of individuals at a 97% similarity level with Mothur analysis

| Sample ID | No. of Reads | No. of OTUs | Ace (lci, hci)   | Chao 1 (lci, hci) | Good's Coverage | Shannon (lci, hci)  | Simpson (lci, hci)        |
|-----------|--------------|-------------|------------------|-------------------|-----------------|---------------------|---------------------------|
| C1        | 38664        | 491         | 523<br>(510,545) | 533<br>(513,570)  | 0.998345        | 3.64<br>(3.62,3.65) | 0.0756<br>(0.0741,0.077)  |
| C2        | 62292        | 422         | 465<br>(448,492) | 468<br>(446,509)  | 0.999005        | 3.8<br>(3.79,3.81)  | 0.0426<br>(0.0421,0.0432) |
| C3        | 51819        | 523         | 562<br>(547,589) | 610<br>(569,688)  | 0.998746        | 3.74<br>(3.72,3.76) | 0.0704<br>(0.0692,0.0716) |
| C4        | 29050        | 481         | 549<br>(525,587) | 568<br>(531,633)  | 0.997108        | 4.03<br>(4.01,4.06) | 0.0645<br>(0.0626,0.0664) |
| C5        | 31372        | 611         | 679<br>(655,715) | 707<br>(666,777)  | 0.997227        | 4.69<br>(4.67,4.71) | 0.0354<br>(0.0343,0.0364) |
| C6        | 79551        | 690         | 770<br>(743,809) | 813<br>(763,895)  | 0.998718        | 3.76<br>(3.75,3.78) | 0.0797<br>(0.0786,0.0807) |
| C7        | 75396        | 538         | 597<br>(574,633) | 664<br>(606,773)  | 0.999005        | 3.88<br>(3.87,3.89) | 0.0603<br>(0.0594,0.0612) |
| C8        | 76552        | 594         | 622<br>(610,645) | 634<br>(613,677)  | 0.999386        | 4.76<br>(4.74,4.77) | 0.021<br>(0.0207,0.0213)  |
| C9        | 81570        | 630         | 666<br>(651,693) | 679<br>(655,728)  | 0.999338        | 4.85<br>(4.84,4.86) | 0.0254<br>(0.0249,0.0259) |

|     |       |     |                     |                    |          |                     |                           |
|-----|-------|-----|---------------------|--------------------|----------|---------------------|---------------------------|
| C10 | 81053 | 659 | 692<br>(678,716)    | 710<br>(684,761)   | 0.999358 | 4.89<br>(4.88,4.91) | 0.0204<br>(0.0201,0.0207) |
| C11 | 87961 | 461 | 599<br>(559,655)    | 578<br>(522,685)   | 0.999216 | 4.3<br>(4.29,4.31)  | 0.0372<br>(0.0366,0.0378) |
| C12 | 90756 | 368 | 385<br>(376,406)    | 383<br>(373,409)   | 0.999747 | 4.38<br>(4.37,4.39) | 0.0243<br>(0.024,0.0246)  |
| C13 | 28949 | 460 | 499<br>(482,527)    | 537<br>(499,614)   | 0.998066 | 4.69<br>(4.67,4.71) | 0.0264<br>(0.0256,0.0272) |
| C14 | 77061 | 479 | 508<br>(495,531)    | 524<br>(501,573)   | 0.999390 | 3.58<br>(3.57,3.59) | 0.0865<br>(0.0853,0.0877) |
| C15 | 92987 | 754 | 1210<br>(1127,1312) | 1058<br>(952,1222) | 0.998215 | 4.78<br>(4.76,4.79) | 0.0252<br>(0.0249,0.0256) |
| C16 | 40172 | 563 | 817<br>(760,891)    | 781<br>(692,931)   | 0.997187 | 4.8<br>(4.78,4.82)  | 0.0222<br>(0.0216,0.0227) |
| C17 | 59784 | 485 | 568<br>(538,614)    | 566<br>(531,629)   | 0.998679 | 4.58<br>(4.57,4.6)  | 0.0246<br>(0.0242,0.025)  |
| C18 | 82628 | 434 | 466<br>(451,494)    | 485<br>(457,545)   | 0.999492 | 3.14<br>(3.12,3.16) | 0.2414<br>(0.2382,0.2446) |
| C19 | 46215 | 391 | 413<br>(402,435)    | 421<br>(404,460)   | 0.999243 | 4.78<br>(4.77,4.79) | 0.0166<br>(0.0162,0.0169) |
| C20 | 31948 | 415 | 448<br>(432,478)    | 444<br>(428,480)   | 0.998842 | 4.93<br>(4.92,4.95) | 0.0156<br>(0.0152,0.016)  |

|     |       |      |                     |                     |          |                     |                           |
|-----|-------|------|---------------------|---------------------|----------|---------------------|---------------------------|
| C21 | 61693 | 528  | 580<br>(560,611)    | 601<br>(568,661)    | 0.998833 | 3.59<br>(3.57,3.61) | 0.0842<br>(0.0829,0.0854) |
| C22 | 43586 | 488  | 523<br>(508,550)    | 543<br>(515,601)    | 0.998830 | 4.46<br>(4.44,4.48) | 0.0383<br>(0.0374,0.0392) |
| C23 | 39867 | 476  | 539<br>(518,572)    | 550<br>(520,601)    | 0.997667 | 2.86<br>(2.84,2.89) | 0.1505<br>(0.1481,0.1528) |
| C24 | 72473 | 532  | 579<br>(560,611)    | 600<br>(567,665)    | 0.999186 | 4<br>(3.98,4.01)    | 0.0742<br>(0.0731,0.0754) |
| C25 | 41945 | 449  | 597<br>(557,651)    | 581<br>(523,685)    | 0.997974 | 4.12<br>(4.11,4.14) | 0.0492<br>(0.0481,0.0502) |
| N1  | 34869 | 1170 | 1268<br>(1242,1303) | 1305<br>(1262,1368) | 0.994953 | 5.27<br>(5.24,5.29) | 0.0246<br>(0.0238,0.0254) |
| N2  | 96215 | 1087 | 1131<br>(1113,1160) | 1139<br>(1114,1187) | 0.999376 | 5.54<br>(5.52,5.55) | 0.0186<br>(0.0182,0.019)  |
| N3  | 84588 | 593  | 641<br>(622,673)    | 660<br>(628,721)    | 0.999255 | 4.83<br>(4.82,4.84) | 0.0317<br>(0.031,0.0324)  |
| N4  | 91573 | 496  | 549<br>(528,586)    | 580<br>(539,661)    | 0.999345 | 4.62<br>(4.61,4.63) | 0.025<br>(0.0247,0.0254)  |
| N5  | 55318 | 544  | 617<br>(590,659)    | 619<br>(586,679)    | 0.998662 | 5.01<br>(5,5.02)    | 0.0179<br>(0.0175,0.0184) |
| N6  | 72186 | 533  | 564<br>(550,590)    | 571<br>(551,613)    | 0.999377 | 4.89<br>(4.88,4.9)  | 0.0209<br>(0.0205,0.0213) |



---

|     |       |     |                    |                    |          |                     |                           |
|-----|-------|-----|--------------------|--------------------|----------|---------------------|---------------------------|
| N7  | 21153 | 427 | 485<br>(463,520)   | 488<br>(460,537)   | 0.996644 | 4.64<br>(4.62,4.66) | 0.0213<br>(0.0207,0.0219) |
| N8  | 24092 | 449 | 531<br>(502,575)   | 532<br>(497,592)   | 0.996389 | 4.83<br>(4.81,4.85) | 0.016<br>(0.0156,0.0165)  |
| N9  | 32876 | 614 | 696<br>(668,738)   | 716<br>(674,787)   | 0.997141 | 4.97<br>(4.95,4.99) | 0.0278<br>(0.0268,0.0288) |
| N10 | 29852 | 457 | 506<br>(487,540)   | 572<br>(515,684)   | 0.997890 | 4.64<br>(4.62,4.66) | 0.0284<br>(0.0276,0.0292) |
| N11 | 20122 | 586 | 653<br>(630,688)   | 677<br>(639,741)   | 0.995478 | 5.26<br>(5.24,5.28) | 0.0113<br>(0.0109,0.0116) |
| N12 | 6154  | 449 | 544<br>(514,587)   | 539<br>(505,594)   | 0.981963 | 4.94<br>(4.91,4.98) | 0.0161<br>(0.0152,0.0171) |
| N13 | 32766 | 944 | 1000<br>(980,1030) | 1031<br>(995,1093) | 0.997284 | 5.79<br>(5.78,5.81) | 0.0121<br>(0.0116,0.0126) |
| N14 | 36951 | 545 | 574<br>(562,596)   | 581<br>(563,617)   | 0.998566 | 4.36<br>(4.34,4.38) | 0.0585<br>(0.0568,0.0602) |
| N15 | 34025 | 510 | 541<br>(528,564)   | 558<br>(534,605)   | 0.998442 | 4.81<br>(4.8,4.83)  | 0.0219<br>(0.0212,0.0225) |
| N16 | 82331 | 382 | 493<br>(457,546)   | 552<br>(484,664)   | 0.998652 | 2.38<br>(2.37,2.4)  | 0.2276<br>(0.2248,0.2303) |
| N17 | 35042 | 411 | 488<br>(461,530)   | 486<br>(454,540)   | 0.997546 | 2.67<br>(2.64,2.69) | 0.2985<br>(0.2931,0.304)  |

---

|     |       |      |                     |                     |          |                     |                           |
|-----|-------|------|---------------------|---------------------|----------|---------------------|---------------------------|
| N18 | 37889 | 545  | 582<br>(567,607)    | 594<br>(571,639)    | 0.998390 | 4.25<br>(4.23,4.27) | 0.0535<br>(0.0522,0.0548) |
| N19 | 34930 | 549  | 595<br>(577,626)    | 600<br>(576,646)    | 0.998254 | 5<br>(4.98,5.02)    | 0.0177<br>(0.0172,0.0182) |
| N20 | 26113 | 354  | 384<br>(371,406)    | 393<br>(373,432)    | 0.998047 | 3.3<br>(3.27,3.32)  | 0.1102<br>(0.1074,0.113)  |
| N21 | 46424 | 403  | 453<br>(434,482)    | 462<br>(436,509)    | 0.998384 | 3.24<br>(3.22,3.26) | 0.0764<br>(0.0755,0.0774) |
| N22 | 77183 | 639  | 688<br>(669,718)    | 700<br>(672,753)    | 0.999132 | 4.5<br>(4.49,4.52)  | 0.0375<br>(0.0368,0.0382) |
| N23 | 40914 | 339  | 422<br>(394,465)    | 443<br>(400,515)    | 0.997678 | 2.73<br>(2.71,2.74) | 0.1339<br>(0.1316,0.1362) |
| N24 | 69870 | 650  | 693<br>(674,727)    | 697<br>(672,750)    | 0.999356 | 5.82<br>(5.82,5.83) | 0.0051<br>(0.005,0.0052)  |
| N25 | 77677 | 1193 | 1252<br>(1232,1284) | 1275<br>(1241,1332) | 0.998841 | 5.67<br>(5.66,5.69) | 0.0125<br>(0.0122,0.0128) |

Sample ID: N represents that the control group; C represents that the serious ovarian cancer group.

Reads: total trimmed sequences that divided into the overall OTUs. The number of OTUs, richness estimator (Chao1, Ace), diversity index (Shannon, Simpson), and coverage index (Good's coverage) are calculated at a 97% similarity level. OTUs: operational taxonomic units; lci: lower confidence interval, hci: higher confidence interval.

**Table S2** Primer Sequences Used for Tissues Microbiota Profiling by qPCR\*.

| Bacterial strains                       |         | Primer sequence (5' to3')  |
|-----------------------------------------|---------|----------------------------|
| Phylum<br><i>Proteobacteria</i>         | Forward | CCGTGAAGTCGGAATCGCTA       |
|                                         | Reverse | ATCACACCGTGGTAACCGTC       |
| Phylum<br><i>Firmicutes</i>             | Forward | CTGATGGAGCAACGCCGCGT       |
|                                         | Reverse | ACACYTAGYACTCATCGTTT       |
| Genus<br><i>Acinetobacter</i>           | Forward | GGCGACGATCTGTAGCGGGTCTG    |
|                                         | Reverse | GGTTACCTTGTTACGACTT        |
| Genus<br><i>Lactococcus</i>             | Forward | TGTAGGGAGCTATAAGTTCTCTGTA  |
|                                         | Reverse | GGCAACCTACTTYGGGTACTCCC    |
| Species<br><i>Acinetobacter_lwoffii</i> | Forward | GGCGACGATCTGTAGCGGGTCTG    |
|                                         | Reverse | CGAGCAGACAGAGCAGAAGA       |
| Species<br><i>Lactococcus_piscium</i>   | Forward | GCTATCCAGCCCTAAGTGA        |
|                                         | Reverse | AAAGGTTAGCTCACCGGCTTTGGGTA |
| 16S rRNA                                | Forward | GCGTAGGCGGATTATCAAGT       |
|                                         | Reverse | CGGATTTTACCCCTACACCA       |

\*Primers were designed based on “Probe Design Tool” of the ARB Software package (<http://www.arb-home.de/>). Ludwig W, Strunk O, Westram R, Richter L, Meier H, Yadhukumar, et al.

ARB: a software environment for sequence data. Nucleic acids research. 2004;32:1363-71.

**Table S3** Phylotypes significantly different between microbiota of ovarian cancer tissues and normal distal fallopian tube tissues.

| Taxonomic Rank | Taxon                                       | mean(C)  | sd(C)    | mean(N)  | sd(N)    | p-value               | q-value  |
|----------------|---------------------------------------------|----------|----------|----------|----------|-----------------------|----------|
| Phylum         | Proteobacteria                              | 0.682696 | 0.100797 | 0.321644 | 0.150875 | 1.42E-09 <sup>S</sup> | 3.11E-08 |
| Genus          | Acinetobacter                               | 0.173228 | 0.10951  | 0.030215 | 0.02409  | 3.67E-09 <sup>S</sup> | 2.10E-06 |
| Species        | Acinetobacter_uncultured_organism           | 0.083345 | 0.034567 | 0.018387 | 0.017883 | 1.17E-08              | 1.06E-05 |
| Species        | Acinetobacter_lwoffii                       | 0.024399 | 0.015352 | 0.003184 | 0.00285  | 1.84E-08 <sup>S</sup> | 1.06E-05 |
| Species        | Acinetobacter_unclassified                  | 0.037841 | 0.097702 | 0.004212 | 0.003451 | 4.98E-08              | 1.39E-05 |
| Species        | Acinetobacter_venetianus_RAG-1_=_CIP_110063 | 0.021904 | 0.019858 | 0.002987 | 0.004587 | 7.51E-07              | 7.85E-05 |
| Genus          | Sphingomonas                                | 0.092867 | 0.077248 | 0.014701 | 0.011951 | 1.81E-06              | 0.000208 |
| Species        | Sphingomonas_azotifigens                    | 0.08644  | 0.077669 | 0.008084 | 0.009162 | 4.54E-07              | 5.22E-05 |
| Genus          | Schlegelella                                | 0.018501 | 0.016323 | 0.000777 | 0.000999 | 6.03E-08              | 1.15E-05 |
| Species        | Schlegelella_uncultured_bacterium           | 0.018501 | 0.016323 | 0.000777 | 0.000999 | 6.03E-08              | 1.39E-05 |
| Genus          | Providencia                                 | 0.016298 | 0.024329 | 0.000829 | 0.001341 | 4.98E-06              | 0.000316 |
| Species        | Providencia_vermicola                       | 0.016298 | 0.024329 | 0.000829 | 0.001341 | 4.98E-06              | 0.000301 |
| Genus          | Cupriavidus                                 | 0.01293  | 0.014496 | 0.000229 | 0.000527 | 6.07E-06              | 0.000341 |
| Species        | Cupriavidus_unclassified                    | 0.012889 | 0.014524 | 0.000196 | 0.000471 | 2.37E-06              | 0.000196 |
| Genus          | Methylobacterium                            | 0.025698 | 0.013783 | 0.013429 | 0.023865 | 5.01E-05              | 0.001685 |
| Species        | Methylobacterium_unclassified               | 0.016868 | 0.010942 | 0.004467 | 0.005525 | 4.67E-06              | 0.000298 |
| Genus          | Sphingobium                                 | 0.01595  | 0.015961 | 0.004849 | 0.006599 | 1.80E-05              | 0.000687 |
| Species        | Sphingobium_yanoikuyae                      | 0.013224 | 0.015643 | 0.004005 | 0.005684 | 1.65E-05              | 0.000826 |

|         |                                             |          |          |          |          |                       |          |
|---------|---------------------------------------------|----------|----------|----------|----------|-----------------------|----------|
| Genus   | Comamonas                                   | 0.010478 | 0.010943 | 0.002556 | 0.003536 | 4.67E-06              | 0.000316 |
| Species | Comamonas_aquatica                          | 0.004772 | 0.003814 | 0.001589 | 0.002663 | 2.77E-05              | 0.001147 |
| Genus   | Enhydrobacter                               | 0.011531 | 0.008989 | 0.004617 | 0.004028 | 0.000384              | 0.007325 |
| Species | Moraxella_osloensis                         | 0.011531 | 0.008989 | 0.004617 | 0.004028 | 0.000384              | 0.007724 |
| Phylum  | Candidate_division_TM7                      | 0.005517 | 0.004677 | 0.032836 | 0.037847 | 0.000104              | 0.001146 |
| Genus   | Candidate_division_TM7_norank               | 0.005517 | 0.004677 | 0.032836 | 0.037847 | 0.000104              | 0.003137 |
| Species | Candidate_division_TM7_uncultured_bacterium | 0.00205  | 0.003253 | 0.027    | 0.039931 | 0.00037               | 0.007601 |
| Phylum  | Firmicutes                                  | 0.084354 | 0.056886 | 0.218328 | 0.192702 | 0.001041 <sup>#</sup> | 0.00405  |
| Genus   | Lactococcus                                 | 0.000466 | 0.000781 | 0.016484 | 0.022114 | 6.56E-06 <sup>S</sup> | 0.000341 |
| Species | Lactococcus_piscium                         | 6.93E-05 | 0.000154 | 0.013657 | 0.019263 | 1.73E-07 <sup>S</sup> | 2.84E-05 |
| Genus   | Fastidiosipila                              | 0.000703 | 0.001134 | 0.024966 | 0.038836 | 0.04378               | 0.138354 |
| Phylum  | Acidobacteria                               | 0.005164 | 0.005098 | 0.016808 | 0.02218  | 0.002991              | 0.009401 |
| Genus   | Subgroup_6_norank                           | 0.001425 | 0.001576 | 0.008113 | 0.01324  | 0.001897              | 0.019815 |

Statistical analysis was performed by Wilcoxon rank-sum test. <sup>#</sup> $P < 0.01$ , <sup>S</sup> $P < 0.001$  acted as the key phylotypes that were selected as microbiological markers based on LEfSe and  $P$  value at different phylogenetic levels to discriminate between C group and N group.

Relative abundances were shown as mean and sd. Data had no statistically significant difference were not shown.
